# Supplementary figures and images for: Deep Learning Modeling of Androgen Receptor Responses to Prostate Cancer Therapies
Source: MDPI journal article supplement (doi:10.3390/ijms21165847), 2020-08-14

SVM precision vs. recall curve for each class

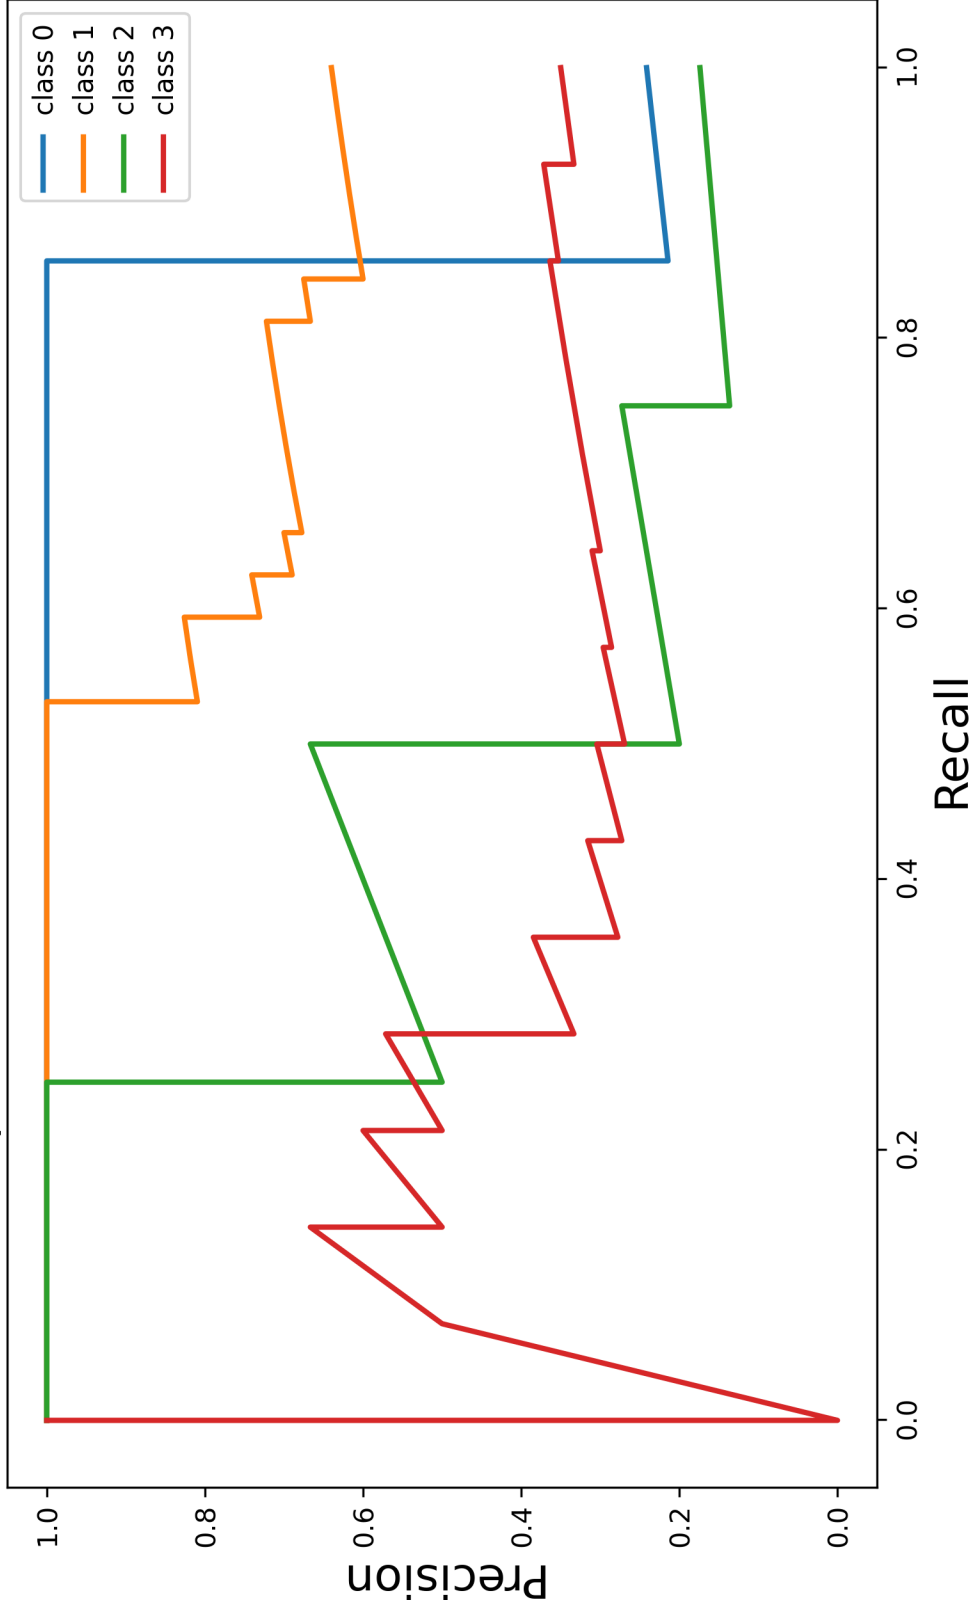

Supplement: s1 [file s1]
